# Supplementary material
Source: PubMed Central journal article supplement (PMC6646201)
Supplement: ao8b01134_si_001.pdf [file ao8b01134_si_001.pdf]

## SUPPORTING INFORMATION

### Production of deuterated Cyanidin 3-O-glucoside from recombinant *Escherichia coli*

Mamta Gupta<sup>†‡</sup>, Jian Zha<sup>†</sup>, Xing Zhang<sup>†</sup>, Gyoo Yeol Jung<sup>‡,§</sup>, Robert J. Linhardt<sup>†</sup>,  
Mattheos A. G. Koffas<sup>†\*</sup>

\*Corresponding Author

<sup>†</sup>Department of Chemical and Biological Engineering, Center for Biotechnology and Interdisciplinary Studies, Rensselaer Polytechnic Institute, Troy, New York 12180, United States

<sup>‡</sup>Department of Botany and Environment Studies, DAV University, Jalandhar 144 001, Punjab, India

<sup>‡</sup>Department of Chemical Engineering, Pohang University of Science and Technology, 77 Cheongam-ro, Nam-gu, Pohang, Gyeongbuk, 37673, Korea

<sup>§</sup>School of Interdisciplinary Bioscience and Bioengineering, Pohang University of Science and Technology, 77 Cheongam-ro, Nam-gu, Pohang, Gyeongbuk, 37673, Korea

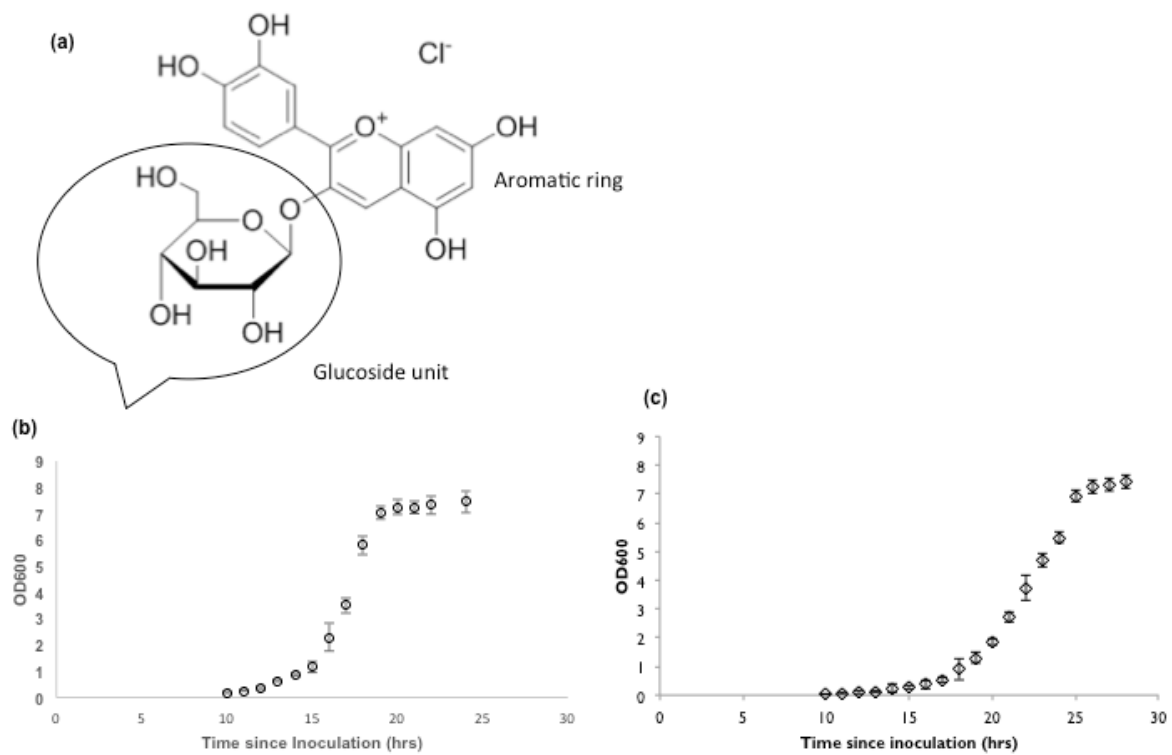

**Figure S1.** Structure of anthocyanidin glucosides (C3G) (a). Growth curve of *E. coli* (At3GT and PhANS) in AMM media supplemented with glucose (b) and glycerol (c).

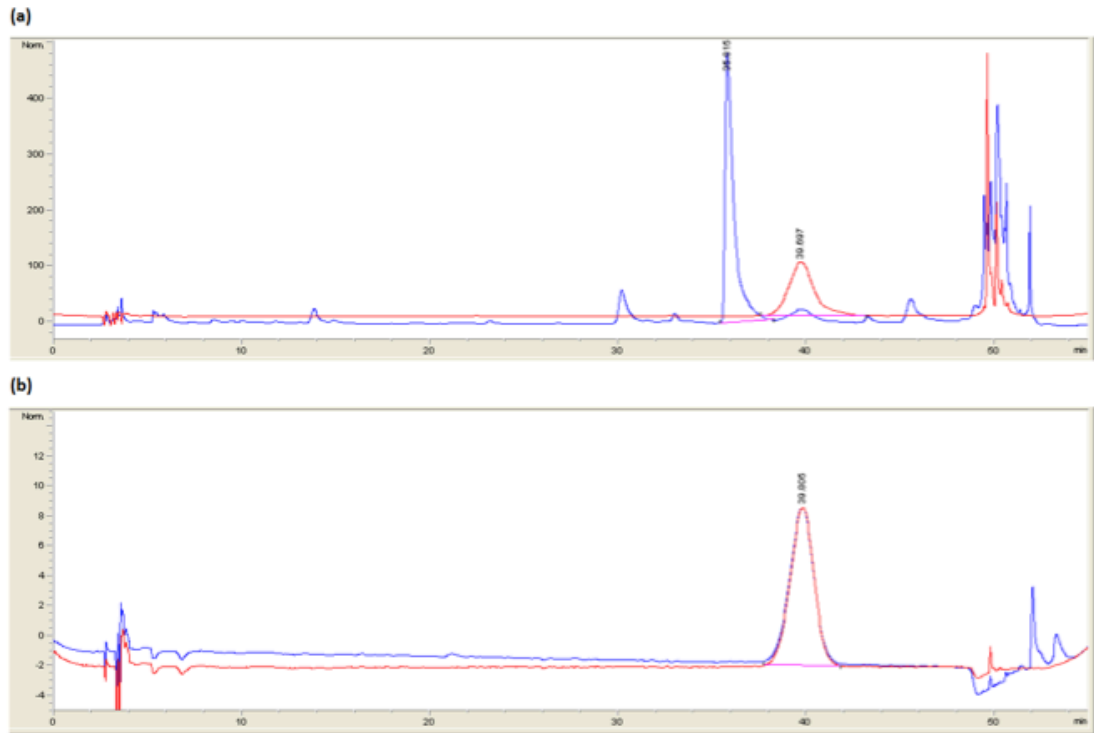

**Figure S2.** Purification of Deuterated cyanidin glucosides from other compounds in cell broth. HPLC peak at 39.0 min at wavelength 520 nm (Red) and 280 nm (blue) shows deuterated cyanidin glucosides (a), Pure standard of cyanidin glucosides (b).

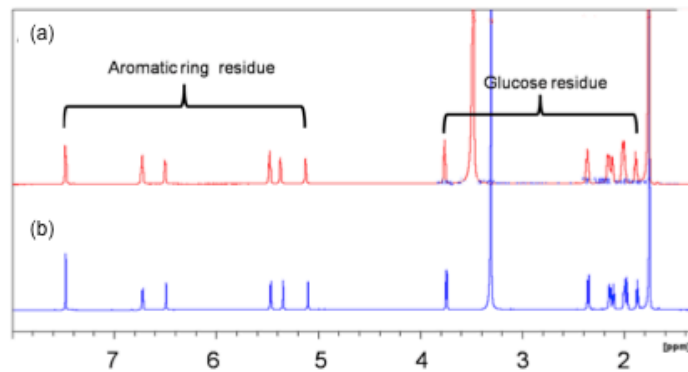

**Figure S3.**  $^1\text{H}$  NMR comparison between 1% DCI treated anthocyanidin (a) and commercial anthocyanidin (b). Two sets of peaks at 5.0–7.5 ppm (denoted with a bracket) and 1.8–3.8 ppm (denoted with a bracket) in both spectra correspond to aromatic protons and glucose protons on anthocyanins, respectively, and they are exactly matched. This control experiment result demonstrated that deuterated exchange would not happen when treated with 1% DCI.
